# Supplementary material
Source: ML conference proceedings conference paper supplement (https://openreview.net/forum?id=2eTsZBoU2W)
Supplement: supplementary_material [file POS_explanation_FetaQA.pdf › supplementary_tmlr/POS_explanation_FetaQA.pdf]

# FeTaQA: Free-form Table Question Answering

**Question: How did San Jose State's record change from 2000-01 to 2001-02?**

**Input Table: Steve Barnes (basketball); Head coaching record**

| Season                                                                  | Team                                                                    | Overall                                                                 | Conference                                                              | Standing                                                                | Postseason                                                              |
|-------------------------------------------------------------------------|-------------------------------------------------------------------------|-------------------------------------------------------------------------|-------------------------------------------------------------------------|-------------------------------------------------------------------------|-------------------------------------------------------------------------|
| San Jose State Spartans<br>(Western Athletic Conference)<br>(1999–2002) |
| 1999–00                                                                 | San Jose State                                                          | 15–15                                                                   | 6–8                                                                     | 5th                                                                     | -                                                                       |
| 2000–01                                                                 | San Jose State                                                          | 14–14                                                                   | 6–10                                                                    | 7th                                                                     | -                                                                       |
| 2001–02                                                                 | San Jose State                                                          | 10–22                                                                   | 4–14                                                                    | 9th                                                                     | -                                                                       |
| San Jose State:                                                         | San Jose State:                                                         | 39–51 (.433)                                                            | 16–32 (.333)                                                            | -                                                                       | -                                                                       |
| Colorado State Rams<br>(Mountain West Conference)<br>(2018)             |
| 2017–18                                                                 | Colorado State                                                          | 0–2                                                                     | 0–2                                                                     | -                                                                       | -                                                                       |
| Colorado State:                                                         | Colorado State:                                                         | 0–2 (.000)                                                              | 0–2 (.000)                                                              | -                                                                       | -                                                                       |
| Total:                                                                  | Total:                                                                  | 39–53 (.424)                                                            | -                                                                       | -                                                                       | -                                                                       |

# FeTaQA: Free-form Table Question Answering

Question: How did San Jose State's record change from 2000-01 to 2001-02?

Input Table: Steve Barnes (basketball); Head coaching record

*Step 1: Select rows where 'Team' is 'San Jose State' and 'Season' is '2000-01' or '2001-02'.*

| Season                                                                  | Team                                                                    | Overall                                                                 | Conference                                                              | Standing                                                                | Postseason                                                              |
|-------------------------------------------------------------------------|-------------------------------------------------------------------------|-------------------------------------------------------------------------|-------------------------------------------------------------------------|-------------------------------------------------------------------------|-------------------------------------------------------------------------|
| San Jose State Spartans<br>(Western Athletic Conference)<br>(1999–2002) |
| 1999–00                                                                 | San Jose State                                                          | 15–15                                                                   | 6–8                                                                     | 5th                                                                     | -                                                                       |
| 2000–01                                                                 | San Jose State                                                          | 14–14                                                                   | 6–10                                                                    | 7th                                                                     | -                                                                       |
| 2001–02                                                                 | San Jose State                                                          | 10–22                                                                   | 4–14                                                                    | 9th                                                                     | -                                                                       |
| San Jose State:                                                         | San Jose State:                                                         | 39–51 (.433)                                                            | 16–32 (.333)                                                            | -                                                                       | -                                                                       |
| Colorado State Rams<br>(Mountain West Conference)<br>(2018)             |
| 2017–18                                                                 | Colorado State                                                          | 0–2                                                                     | 0–2                                                                     | -                                                                       | -                                                                       |
| Colorado State:                                                         | Colorado State:                                                         | 0–2 (.000)                                                              | 0–2 (.000)                                                              | -                                                                       | -                                                                       |
| Total:                                                                  | Total:                                                                  | 39–53 (.424)                                                            | -                                                                       | -                                                                       | -                                                                       |

# FeTaQA: Free-form Table Question Answering

**Question:** How did San Jose State's record change from 2000-01 to 2001-02?

**Input Table:** Steve Barnes (basketball); Head coaching record

*Step 2: Select 'Overall' column for both seasons.*

| Season  | Team           | Overall | Conference | Standing | Postseason |
|---------|----------------|---------|------------|----------|------------|
| 2000–01 | San Jose State | 14-14   | 6–10       | 7th      | -          |
| 2001–02 | San Jose State | 10-22   | 4–14       | 9th      | -          |

# FeTaQA: Free-form Table Question Answering

**Question:** How did San Jose State's record change from 2000-01 to 2001-02?

**Input Table:** Steve Barnes (basketball); Head coaching record

*Step 3: Ask LLM to generate the final answer based on the table.*

|         |
|---------|
| Overall |
| 14–14   |
| 10–22   |

# FeTaQA: Free-form Table Question Answering

**Question:** How did San Jose State's record change from 2000-01 to 2001-02?

**Input Table:** Steve Barnes (basketball); Head coaching record

*Step 3: Ask LLM to generate the final answer based on the table.*

|         |
|---------|
| Overall |
| 14–14   |
| 10–22   |

## *Output and Ground-truth Answer:*

**Generated Answer:** San Jose State's record changed from 14–14 in the 2000-01 season to 10–22 in the 2001-02 season.

**Ground-truth Answer:** San Jose State dropped to a 10–22 record in 2001–02 from a 14-14 record in 2000-01.
